# Supplementary material
Source: Research Square preprint supplement (doi:10.21203/rs.3.rs-8921803/v1)
Supplement: Supplementary file 1 [file 3fef24026432359360e215a4.docx]

# Appendix

Table A1. List of Constructs and Items

| Construct | Item | Description | Reference |
| --- | --- | --- | --- |
| Color | CLR1 | The colors of the virtual screen when wearing a VR headset are good. | [Toufani et al. (2017)](#_ENREF_12) |
| CLR2 | The virtual screen viewed while wearing the VR headset has a wide range of colors. |
| CLR3 | The colors of the virtual screen viewed with the VR headset are well represented throughout. |
| Aesthetics | ATH1 | The virtual screen (e.g., colors, organization, menus) is beautiful when viewed with a VR headset. | [Lee and Kim (2019)](#_ENREF_9) |
| ATH2 | The content of the virtual screen viewed while wearing the VR headset appears to be beautifully designed. |
| ATH3 | The components of the virtual screen (e.g., icons, composition) that are visible when wearing the VR headset are aesthetically pleasing. |
| Audio | AUD1 | The audio (sound) quality of the VR headset is crisp and clear. | [Yao (2017)](#_ENREF_14)  ;[Schoeffler et al. (2015)](#_ENREF_11) |
| AUD2 | The sound of the VR headset enhances the overall VR experience. |
| AUD3 | The VR headset provides a realistic and engaging audio experience. |
| Haptic | HAP1 | The haptic (vibration) feedback from the VR device (headset or controller) enhances the realism of the experience. | [Lee and Kim (2008)](#_ENREF_10)  ;[Kaber and Zhang (2011)](#_ENREF_7) |
| HAP2 | The haptic response of the VR device makes touch feel more realistic and responsive. |
| HAP3 | The haptic response of the VR device is timely and accurate. |
| Presence | PRS1 | When I experience VR, I feel like I am in the real world. | [Lee et al. (2020)](#_ENREF_8)  ;[Yung et al. (2021)](#_ENREF_15) |
| PRS2 | I felt like I was physically present in the virtual reality when experiencing VR. |
| PRS3 | I felt that the avatar or objects in the virtual reality were real. |
| Flow | FLW1 | I felt that I was focused on using virtual reality when experiencing VR. | [Wu et al. (2021)](#_ENREF_13)  ;[Guerra-Tamez (2023)](#_ENREF_5) |
| FLW2 | I felt like time was passing quickly when experiencing VR. |
| FLW3 | I felt immersed while experiencing VR. |
| Escapism | ESC1 | I can temporarily Escapism my current real-world situation while experiencing VR. | [Chen et al. (2016)](#_ENREF_4)  ;[Ballabio et al. (2017)](#_ENREF_2) |
| ESC2 | I can temporarily Escapism from real-world relationships while experiencing VR. |
| ESC3 | I can forget about school or work while experiencing VR. |
| Vicarious  Satisfaction | VIC1 | I can experience things in VR that are difficult to do in real life. | [Jang (2022)](#_ENREF_6) |
| VIC2 | I can go places in VR that I can't go in real life. |
| VIC3 | I can do things in VR that I can't do in real life. |
| Well-being | WEB1 | I feel emotionally calm while experiencing VR. | [Agarwal et al. (2019)](#_ENREF_1)  ;[Butt et al. (2020)](#_ENREF_3) |
| WEB2 | I feel healthy and happy while experiencing VR. |
| WEB3 | VR plays an important role in refreshing my mood. |

Reference

Agarwal, S., Garg, P., & Rastogi, R. (2019). Testing the reciprocal relationship between quality of work life and subjective well-being: a path analysis model. *International Journal of Project Organisation and Management*, *11*(2), 140-153.

Ballabio, M., Griffiths, M. D., Urbán, R., Quartiroli, A., Demetrovics, Z., & Király, O. (2017). Do gaming motives mediate between psychiatric symptoms and problematic gaming? An empirical survey study. *Addiction Research & Theory*, *25*(5), 397-408.

Butt, T. H., Abid, G., Arya, B., & Farooqi, S. (2020). Employee energy and subjective well-being: a moderated mediation model. *The Service Industries Journal*, *40*(1-2), 133-157.

Chen, A., Lu, Y., & Wang, B. (2016). Enhancing perceived enjoyment in social games through social and gaming factors. *Information Technology & People*, *29*(1), 99-119. <https://doi.org/10.1108/ITP-07-2014-0156>

Guerra-Tamez, C. R. (2023). The impact of immersion through virtual reality in the learning experiences of art and design students: The mediating effect of the flow experience. *Education Sciences*, *13*(2), 185.

Jang, C. S. (2022). *A study on the factors influencing the perception of metaverse services : Focusing on motivation to use and immersion* Kyung Hee University].

Kaber, D. B., & Zhang, T. (2011). Human factors in virtual reality system design for mobility and haptic task performance. *Reviews of Human Factors and Ergonomics*, *7*(1), 323-366.

Lee, M., Lee, S. A., Jeong, M., & Oh, H. (2020). Quality of virtual reality and its impacts on behavioral intention. *International Journal of Hospitality Management*, *90*, 102595.

Lee, S.-Y., & Kim, H.-J. (2019). A Study on the Factors Affecting Flow in e-Learning Environment-Focusing on Interaction Factors and Affordance. *The Journal of the Korea Contents Association*, *19*(10), 522-534.

Lee, S., & Kim, G. J. (2008). Effects of haptic feedback, stereoscopy, and image resolution on performance and presence in remote navigation. *International Journal of Human-Computer Studies*, *66*(10), 701-717.

Schoeffler, M., Gernert, J. L., Neumayer, M., Westphal, S., & Herre, J. (2015). On the validity of virtual reality-based auditory experiments: a case study about ratings of the overall listening experience. *Virtual Reality*, *19*, 181-200.

Toufani, S., Stanton, J. P., & Chikweche, T. (2017). The importance of aesthetics on customers’ intentions to purchase smartphones. *Marketing Intelligence & Planning*, *35*(3), 316-338.

Wu, S.-H., Wei, N.-C., Hsu, H.-C., & Pu, T.-C. (2021). Exploring the intention of visiting the museum using immersive virtual reality technique and flow experience. *International Journal of Organizational Innovation (Online)*, *14*(1), 25-40.

Yao, S.-N. (2017). Headphone-based immersive audio for virtual reality headsets. *IEEE Transactions on Consumer Electronics*, *63*(3), 300-308.

Yung, R., Khoo-Lattimore, C., & Potter, L. E. (2021). Virtual reality and tourism marketing: Conceptualizing a framework on presence, emotion, and intention. *Current Issues in Tourism*, *24*(11), 1505-1525.
